# Supplementary material for: Phosphorus–tungsten dual-doping boosts acidic overall seawater splitting performance over RuOx nanocrystals
Source: Royal Society of Chemistry journal article supplement (doi:10.1039/d4ta05277c), 2024-01-01
Supplement: d4ta05277c1.pdf [file d4ta05277c1.pdf]

## ***Supplementary Materials for***

### **Phosphorus-tungsten dual-doping boosts acidic overall seawater splitting performance over RuO<sub>x</sub> nanocrystals**

*Junyang Ding<sup>a,b,†</sup>, Zimo Peng<sup>b,†</sup>, Zhiwei Wang<sup>c</sup>, Chunhui Zeng<sup>a,\*</sup>, Yanhong Feng<sup>c</sup>, Miaosen  
Yang<sup>a,\*</sup>, Guagnzhi Hu<sup>d</sup>, Jun Luo<sup>e</sup>, and Xijun Liu<sup>c,\*</sup>*

*<sup>a</sup> School of Chemical Engineering, Northeast Electric Power University, Jilin 132012, Jilin, China*

*<sup>b</sup> Institute for New Energy Materials & Low-Carbon Technologies, School of Materials Science and Engineering, Tianjin University of Technology, Tianjin 300384, China*

*<sup>c</sup> State Key Laboratory of Featured Metal Materials and Life-cycle Safety for Composite Structures, Guangxi Key Laboratory of Processing for Non-ferrous Metals and Featured Materials, MOE Key Laboratory of New Processing Technology for Nonferrous Metals and Materials, School of Resources, Environment and Materials, Guangxi University, Nanning, 530004 Guangxi, China*

*<sup>d</sup> Institute for Ecological Research and Pollution Control of Plateau Lakes School of Ecology and Environmental Science, Yunnan University, Kunming 650504, China*

*<sup>e</sup> ShenSi Lab, Shenzhen Institute for Advanced Study, University of Electronic Science and Technology of China, Longhua District, Shenzhen 518110, China*

**Corresponding authors:** zengchunhuijia@163.com; ymiaosen@163.com; xjliu@gxu.edu.cn

† These authors contributed equally to this work.

## Experimental Section

### Structural Characterizations

Powder X-ray diffraction (PXRD,  $2\theta = 10-80^\circ$ ) measurements were undertaken on a Rigaku SmartLab 9KW diffractometer (Cu  $K_\alpha$ ,  $\lambda = 1.5418 \text{ \AA}$ ). Scanning electron microscopy (SEM, FEI Verios 460 L), transmission electron microscope (TEM, FEI Talos F200 X), and the equipped X-ray electron dispersive spectroscopy (EDS) were conducted to analyze the morphology and composition of the samples. X-ray photoelectron spectroscopy (XPS), using Al  $K_\alpha$  radiation, was acquired on a Thermo ESCALAB250Xi, which was then calibrated against the benchmark C 1s (284.8 eV) peak location.

### Electrochemical Measurements

Using a standard three-electrode setup at the CHI760E workstation (Chenhua, Shanghai), acidic seawater containing 0.5 M  $\text{H}_2\text{SO}_4$  or individual 0.5 M  $\text{H}_2\text{SO}_4$  aqueous solution, and ambient temperature, the two half-reactions of water splitting (i.e., HER and OER) were investigated. The natural seawater is taken from the Yellow Sea of China. The main ions in the real seawater are  $\text{Cl}^-$  (19300 ppm),  $\text{K}^+$  (300 ppm),  $\text{Na}^+$  (10800 ppm),  $\text{Ca}^{2+}$  (400 ppm),  $\text{Br}^-$  (70 ppm), and  $\text{Mg}^{2+}$  (1300 ppm). In this system, the  $\text{Hg}/\text{Hg}_2\text{SO}_4$  electrodes (within saturated  $\text{K}_2\text{SO}_4$ ) are employed as reference electrodes, while graphite rods (6.0 mm in diameter) serve as counter electrodes. For working electrodes, as-prepared powder electrocatalysts loaded on carbon paper (CP,  $1.0 \times 2.0 \text{ cm}^2$ , Hesen, HCP-020) were employed and their exposed geometrical areas were all fixed at  $1.0 \text{ cm}^2$ . The preparation procedure was as follows: with the aid of sonication for 30 min, 3 mg of PW-OA- $\text{RuO}_x@C$ , 3 mg of carbon black, and 500  $\mu\text{L}$  of Nafion/ethanol solution with a volume ratio of 1/4 were well dispersed together to prepare sample ink, and then coating 200  $\mu\text{L}$  ink on CP and drying it in an oven at  $60^\circ\text{C}$ . Instead, a pair of PW-OA- $\text{RuO}_x@C||\text{PW-OA-}\text{RuO}_x@C$  electrodes that are identical were used to assess their total water splitting characteristics. All potentials applied were converted to the reversible hydrogen electrode ( $E_{\text{RHE}}$ ) using the formula ( $E_{\text{RHE}} = E_{\text{Hg}/\text{Hg}_2\text{SO}_4} + 0.652 \text{ V} + 0.059$

× pH) and RHE calibration (Figure S1). The 90% iR-corrected linear sweep voltammetry (LSV) curves with a scan rate of 5 mV s<sup>-1</sup> were recorded. Within the frequency range from 0.1 to 100000 Hz and an amplitude of 5 mV, the electrochemical impedance spectroscopy (EIS) was carried out. Cyclic voltammetry (CV) curves are measured at various scan rates of 20 ~ 100 mV s<sup>-1</sup> for calculating the double layer capacitances (C<sub>dl</sub>) values. The chronopotentiometry tests are configured at a constant current density of 10 mA cm<sup>-2</sup>.

### **DFT details**

The PW-OA-RuO<sub>x</sub> and RuO<sub>2</sub> models were constructed under the density functional theory (DFT) in the VASP. The lattice structure was set to periodic 4 × 2 unit cells, i.e., each structure has three layers of metal atoms including the fixed one layer bottom atom as well as other relaxed two layer atoms for adsorbing objects. According to the characterization analysis results, the model of (110) surface of RuO<sub>2</sub> with incorporated W and P atoms was considered as PW-OA-RuO<sub>x</sub>@C. To analyze the Perdew-Burke-Emzerhof (PBE) exchange effect and related influence under the condition of generalized gradient approximation, the vacuum space was set to 15 Å. And, the Brillouin zone was sampled with 1 × 1 × 1. Nuclear processes and atomic charges were analyzed by the effective core potential (ECP) and Hirshfeld method, respectively.

The free energy of atomic structure is determined as follows:

$$\Delta G = \Delta E + \Delta ZPVE + \int C_p dT - T \Delta S,$$

where  $\Delta E$  is the change of adsorption energy,  $\Delta ZPVE$  is the difference of zero-point energy, and  $\Delta S$  is the difference of entropy,  $C_p$  is the heat capacity, and T is the system temperature.

## Figures and Tables

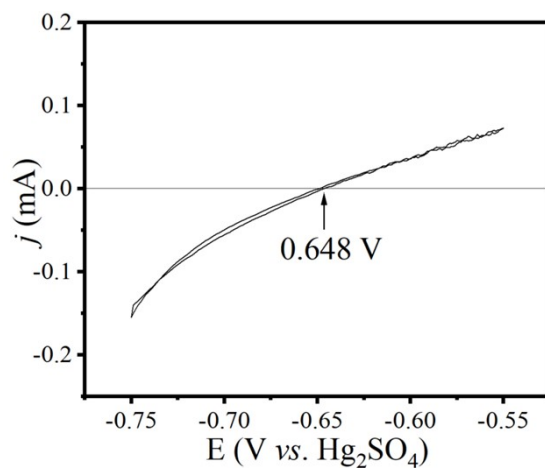

**Figure S1.** The calibration CVs graph of Hg<sub>2</sub>SO<sub>4</sub> electrode vs RHE.

In this work, the high purity hydrogen saturated acidic seawater (0.5 M H<sub>2</sub>SO<sub>4</sub> + natural seawater) as the electrolyte, the Hg<sub>2</sub>SO<sub>4</sub> electrode as the reference electrode, two Pt sheets (1.0 × 1.0 cm<sup>2</sup>) as the working electrode and counter electrode, respectively. As shown in Figure S1, the CVs test with a scan rate of 1 mV s<sup>-1</sup> is performed and the average of the two potentials at current crossed zero is the correction potential of hydrogen electrode reactions. So in alkaline seawater,  $E_{\text{RHE}} = E_{\text{Hg}/\text{Hg}_2\text{SO}_4} + 0.648 \text{ V}$ .

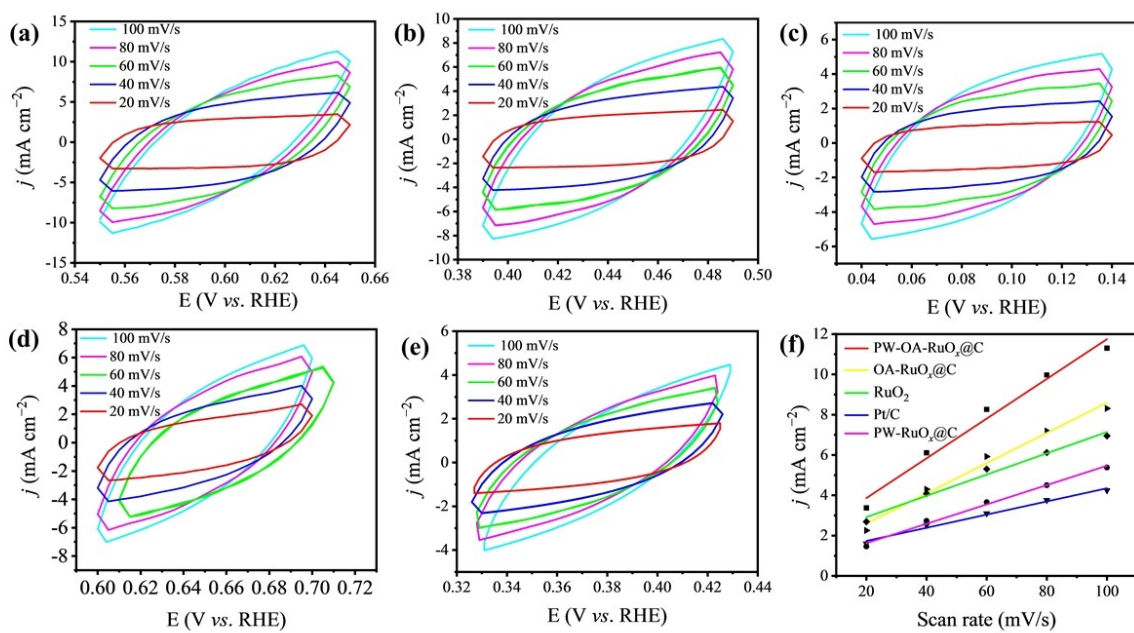

**Figure S2.** Typical CV curves of (a) PW-OA-RuO<sub>x</sub>@C, (b) OA-RuO<sub>x</sub>@C, (c) PW-RuO<sub>x</sub>@C, (d) RuO<sub>2</sub>, (e) Pt/C with different scan rates; (f)  $C_{dl}$  of various catalysts.

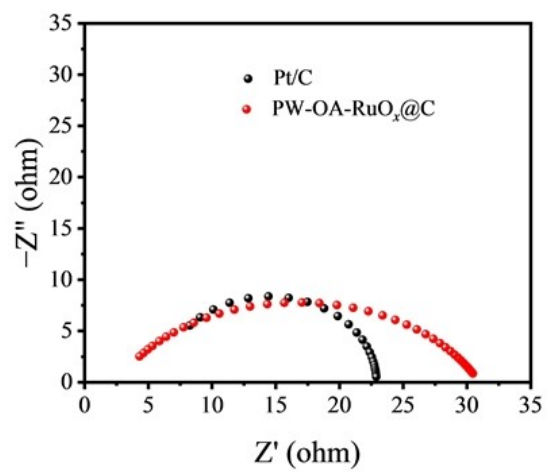

**Figure S3.** EIS of PW-OA-RuO<sub>x</sub>@C and Pt/C.

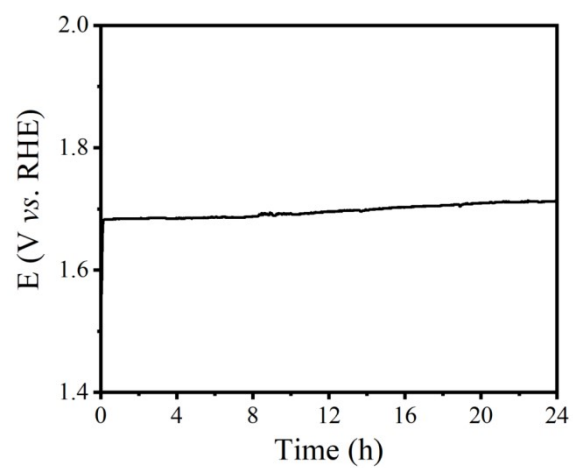

**Figure S4.** Long-term durability test of the PtC||RuO<sub>2</sub> at the constant current density of 10 mA cm<sup>-2</sup> for the overall water splitting in acidic seawater.

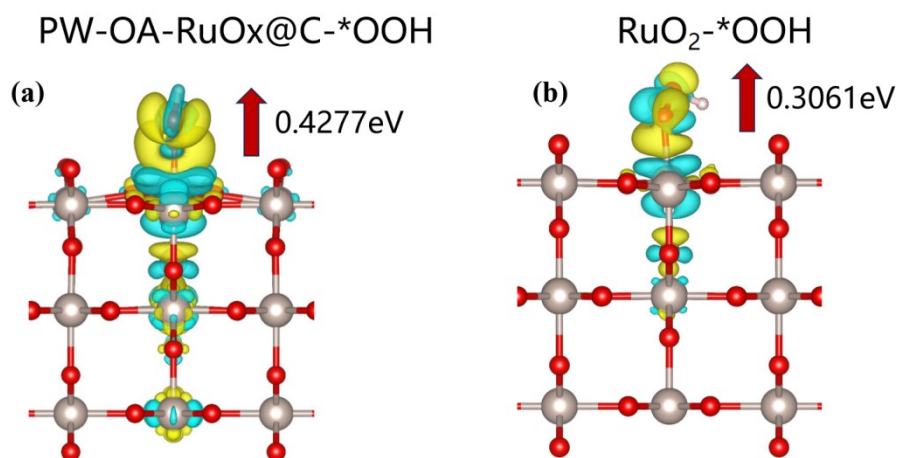

**Figure S5.** Charge density difference of (a) \*OOH on PW-OA-RuO<sub>x</sub>@C (110) and (b) \*OOH on RuO<sub>2</sub> (110). Note that yellow and cyan shadows represent charge accumulation and depletion in the space, respectively.



**Table S1** Comparisons of the HER activity for the PW-OA-RuO<sub>x</sub>@C and some recently reported catalysts.

| Catalyst                                | Electrolyte                          | Overpotential at<br>10 mA cm <sup>-2</sup><br>(mV) | Ref.                                           |
|-----------------------------------------|--------------------------------------|----------------------------------------------------|------------------------------------------------|
| PW-OA-RuO <sub>x</sub> @C               | Acidic seawater                      | 45                                                 | This work                                      |
|                                         | 0.5 M H <sub>2</sub> SO <sub>4</sub> | 39                                                 |                                                |
| FeCoCrMoCBY                             | 0.5 M H <sub>2</sub> SO <sub>4</sub> | 62                                                 | J. Mater. Sci. Technol.<br>2024, 170, 212-220. |
| WC-CFP                                  | 0.5 M H <sub>2</sub> SO <sub>4</sub> | 152                                                | J. Energy Chem. 2021, 62,<br>610-616.          |
| RuIrTe NTs                              | 0.5 M H <sub>2</sub> SO <sub>4</sub> | 29                                                 | J. Mater. Chem. A. 2022,<br>10, 2021-2026.     |
| 0.2rGO-MoS <sub>2</sub>                 | 0.5 M H <sub>2</sub> SO <sub>4</sub> | 146                                                | Chem. Eng. J. 2021, 418,<br>129343.            |
|                                         | 1.0 M KOH                            | 314                                                |                                                |
| V-CoP <sub>2</sub> /CC                  | 0.5 M H <sub>2</sub> SO <sub>4</sub> | 50                                                 | Angew. Chem. Int. Ed.<br>2022, 61, e202116233. |
| 1T-MoS <sub>2</sub>                     | 0.5 M H <sub>2</sub> SO <sub>4</sub> | 136                                                | Chem. Eng. J. 2021, 422,<br>130100.            |
| SrHf <sub>1-x</sub> RuxO <sub>3-δ</sub> | 0.5 M H <sub>2</sub> SO <sub>4</sub> | 48                                                 | Adv. Funct. Mater. 2023,<br>33, 2213523.       |
| FeP/Ni <sub>2</sub> P/CP                | 0.5 M H <sub>2</sub> SO <sub>4</sub> | 51                                                 | J. Mater. Chem. A.<br>2022,10, 15569-15579.    |
|                                         | 1.0 M KOH                            | 46                                                 |                                                |

**Table S2** Comparisons of the OER activity for the PW-OA-RuO<sub>x</sub>@C and some recently reported catalysts.

| Catalyst                                                         | Electrolyte                           | Overpotential<br>at 10 mA cm <sup>-2</sup><br>(mV) | Ref.                                           |
|------------------------------------------------------------------|---------------------------------------|----------------------------------------------------|------------------------------------------------|
| PW-OA-RuO <sub>x</sub> @C                                        | Acidic seawater                       | 158                                                | This work                                      |
|                                                                  | 0.5 M H <sub>2</sub> SO <sub>4</sub>  | 241                                                |                                                |
| IrCoNi PHNCs                                                     | 0.1 M HClO <sub>4</sub>               | 303                                                | Adv. Mater. 2017, 29,<br>1703798               |
| P-IrCu <sub>1.4</sub> NCs                                        | 0.05 M H <sub>2</sub> SO <sub>4</sub> | 311                                                | Chem. Mater. 2018, 30,<br>8571.                |
| RuPbO <sub>x</sub>                                               | 0.5 M H <sub>2</sub> SO <sub>4</sub>  | 191                                                | Nano Energy. 2022, 104,<br>107960              |
| 3R-IrO <sub>2</sub>                                              | 0.1 M HClO <sub>4</sub>               | 188                                                | Joule, 2021, 5, 3221-3234.                     |
| Bi <sub>x</sub> Er <sub>2-x</sub> Ru <sub>2</sub> O <sub>7</sub> | 0.1 M HClO <sub>4</sub>               | 180                                                | Nat. Commun. 2022, 13,<br>4106.                |
| Ag <sub>1</sub> /IrO <sub>x</sub> SAC                            | 0.5 M H <sub>2</sub> SO <sub>4</sub>  | 224                                                | ACS Energy Lett. 2021, 6,<br>4, 1588-1595.     |
| RuO <sub>2</sub> /BNNS                                           | 0.5 M H <sub>2</sub> SO <sub>4</sub>  | 180                                                | Angew. Chem. Int. Ed.<br>2024, 63, e202402018. |
| Ru@Ir-O                                                          | 0.5 M H <sub>2</sub> SO <sub>4</sub>  | 238                                                | Small 2022, 18, 2108031                        |

**Table S3** Comparisons of the overall water splitting activity for the PW-OA-RuO<sub>x</sub>@C and some recently reported catalysts.

| Catalyst                             | Electrolyte                           | Voltage at 10 mA cm <sup>-2</sup><br>(V) | Ref.                                        |
|--------------------------------------|---------------------------------------|------------------------------------------|---------------------------------------------|
| PW-OA-RuO <sub>x</sub> @C            | Acidic seawater                       | 1.47                                     | This work                                   |
|                                      | 0.5 M H <sub>2</sub> SO <sub>4</sub>  | 1.49                                     |                                             |
| Co-SAC/RuO <sub>2</sub>              | 0.5 M H <sub>2</sub> SO <sub>4</sub>  | 1.511                                    | J. Mater. Chem. A, 2022, 10, 2021-2026.     |
| np-Pd <sub>50</sub> Ir <sub>50</sub> | 0.5 M H <sub>2</sub> SO <sub>4</sub>  | 1.52                                     | J. Mater. Chem. A, 2023,11, 11526-11533     |
| RuO <sub>2</sub> -WC NPs             | 0.5 M H <sub>2</sub> SO <sub>4</sub>  | 1.66                                     | Angew. Chem. Int. Ed. 2022, 61, e202202519. |
| 5%Pt-Ru ONAs/C                       | 0.5 M H <sub>2</sub> SO <sub>4</sub>  | 1.486                                    | Chin. J. Catal. 2022, 43(6), 1493-1501.     |
|                                      | 0.05 M H <sub>2</sub> SO <sub>4</sub> | 1.497                                    |                                             |
| V-CoP <sub>2</sub> /CC               | 0.5 M H <sub>2</sub> SO <sub>4</sub>  | 1.47                                     | Angew. Chem. Int. Ed. 2022, 61, e202116233. |
| IrNi NCs                             | 0.5 M H <sub>2</sub> SO <sub>4</sub>  | 1.58                                     | Adv. Funct. Mater. 2017, 27, 1700886.       |
| RuIr-NC                              | 0.05 M H <sub>2</sub> SO <sub>4</sub> | 1.485                                    | Nat. Commun. 2021, 12, 1145.                |
| Pt-RuO <sub>2</sub> @KB              | 0.1 M HClO <sub>4</sub>               | 1.54                                     | J. Mater. Chem. A, 2022,10, 13241-13246.    |

The assembled PW-OA-RuO<sub>x</sub>@C||PW-OA-RuO<sub>x</sub>@C acidic water/seawater electrolyzer can be stabilized for 50 h at 10 mA cm<sup>-2</sup> current densities, and it was discovered that this PW-OA-RuO<sub>x</sub>@C electrocatalysts were on par with or even superior to those of these reported catalysts in recent years in Table S3. For the HER/OER half-responses, we also summarize recently reported state-of-the-art materials (Tables S1, S2). For HER, PW-OA-RuO<sub>x</sub>@C is comparable to the reported noble metal catalysts and far superior to the non-precious metal catalysts; while for OER, the electrocatalysts are basically focused on Ru-based or Ir-based materials, and PW-OA-RuO<sub>x</sub>@C is as superior as these catalysts, which suggests that the high efficiency bifunctional electrocatalytic materials for acid water decomposition still have broad development prospects.
